# Supplementary material
Source: publisher figshare collection journal article supplement (https://sage.figshare.com/ndownloader/files/12467846)
Supplement: Supplementary file 1 [file 12467846]

**Supplementary Table 1.** Light microscopy (LM), immunofluorescence (IF), and transmission electron microscopy (TEM) results of samples tested with anti-canine lambda light chain (LLC) antibody (A40-124A, Bethyl Laboratories).

| Case    | LM   | IF (LLC)          | TEM                                  | Novice IHC                                          | Trained IHC                                         |
|---------|------|-------------------|--------------------------------------|-----------------------------------------------------|-----------------------------------------------------|
| B151008 | FSGS | Trace nonspecific | Electron-dense deposits not observed | Moderate staining on capillary and mesangium        | Moderate staining on capillary and mesangium        |
| B151005 | FSGS | Trace nonspecific | Electron-dense deposits not observed | Weak staining on capillary and mesangium            | Weak staining on capillary and mesangium            |
| B151004 | FSGS | Trace nonspecific | Electron-dense deposits not observed | Moderate-strong staining on capillary and mesangium | Weak-moderate staining on capillary and mesangium   |
| B150912 | FSGS | Trace nonspecific | Electron-dense deposits not observed | Strong staining on capillary and mesangium          | Moderate staining on capillary and mesangium        |
| B150911 | FSGS | Trace nonspecific | Electron-dense deposits not observed | Weak-moderate staining on capillary and mesangium   | Moderate staining on capillary and mesangium        |
| B150806 | FSGS | Trace nonspecific | Electron-dense deposits not observed | Moderate-strong staining on capillary and mesangium | Strong staining on capillary and mesangium          |
| B150802 | FSGS | Trace nonspecific | Electron-dense deposits not observed | Moderate staining on capillary and mesangium        | Strong staining on capillary and mesangium          |
| B150731 | FSGS | Trace nonspecific | Electron-dense deposits not observed | Moderate-strong staining on capillary and mesangium | Moderate-strong staining on capillary and mesangium |

| Case    | LM   | IF (LLC)                                                                | TEM                                                | Novice IHC                                          | Trained IHC                                         |
|---------|------|-------------------------------------------------------------------------|----------------------------------------------------|-----------------------------------------------------|-----------------------------------------------------|
| B150724 | FSGS | Trace nonspecific                                                       | Electron-dense deposits not observed               | Weak-moderate staining on capillary and mesangium   | Weak-moderate staining on capillary and mesangium   |
| B150722 | FSGS | Trace nonspecific                                                       | Electron-dense deposits not observed               | Moderate staining on capillary and mesangium        | Moderate-strong staining on capillary and mesangium |
| B150705 | FSGS | Trace nonspecific                                                       | Electron-dense deposits not observed               | Moderate-strong staining on capillary and mesangium | Weak-moderate staining on capillary and mesangium   |
| B150616 | FSGS | Trace nonspecific                                                       | Electron-dense deposits not observed               | Moderate staining on capillary and mesangium        | Weak-moderate staining on capillary and mesangium   |
| B150607 | FSGS | Trace nonspecific                                                       | Electron-dense deposits not observed               | Weak staining on capillary and mesangium            | Weak-moderate staining on capillary and mesangium   |
| B150418 | FSGS | Trace nonspecific                                                       | Electron-dense deposits not observed               | Trace nonspecific                                   | Trace nonspecific                                   |
| B150408 | FSGS | Trace nonspecific                                                       | Electron-dense deposits not observed               | Moderate staining on capillary and mesangium        | Weak-moderate staining on capillary and mesangium   |
| B150407 | FSGS | Trace nonspecific                                                       | Electron-dense deposits not observed               | Trace nonspecific                                   | Trace nonspecific                                   |
| B150307 | FSGS | Trace nonspecific                                                       | Electron-dense deposits not observed               | Moderate staining on capillary and mesangium        | Moderate-strong staining on capillary and mesangium |
| B150910 | MPGN | Strong granular and chunky staining along capillary walls and mesangium | Subepithelial, subendothelial, and mesangial zones | Trace nonspecific                                   | Trace nonspecific                                   |

| Case    | LM   | IF (LLC)                                                                         | TEM                                                                        | Novice IHC                                        | Trained IHC                                         |
|---------|------|----------------------------------------------------------------------------------|----------------------------------------------------------------------------|---------------------------------------------------|-----------------------------------------------------|
| B150909 | MPGN | Strong granular staining along capillary walls and mesangium                     | Subepithelial deposits                                                     | Trace nonspecific                                 | Trace nonspecific                                   |
| B150908 | MGN  | Strong granular staining along capillary walls                                   | Subendothelial deposits                                                    | Moderate staining on capillary and mesangium      | Moderate-strong staining on capillary and mesangium |
| B150812 | MPGN | Strong granular staining along capillary walls and mesangium                     | Subendothelial, intramembranous, and mesangial electron-dense deposits     | Trace nonspecific                                 | Weak-moderate staining on capillary and mesangium   |
| B150803 | MPGN | Strong granular staining along capillary walls and mesangium                     | Subepithelial, subendothelial, and mesangial deposits                      | Weak staining on capillary and mesangium          | Weak-moderate staining on capillary and mesangium   |
| B150728 | MPGN | Moderate granular staining along capillary walls and mesangium                   | Subendothelial, intramembranous, and subepithelial electron-dense deposits | Weak-moderate staining on capillary and mesangium | Weak-moderate staining on capillary and mesangium   |
| B150716 | MPGN | Moderate granular staining mostly along mesangial zones and some capillary walls | Electron deposits in mesangial zones                                       | Weak-moderate staining on capillary and mesangium | Weak-moderate staining on capillary and mesangium   |
| B150715 | MPGN | Moderate granular staining along capillary walls and mesangium                   | Subepithelial and subendothelial deposits                                  | Trace nonspecific                                 | Trace nonspecific                                   |
| B150701 | MPGN | Weak granular staining in mesangium                                              | Electron deposits in mesangial zones                                       | Trace nonspecific                                 | Weak-moderate staining on capillary and mesangium   |
| B150614 | MPGN | Moderate granular staining along capillary walls and mesangium                   | Subendothelial deposits and some mesangial zones                           | Weak-moderate staining on capillary and mesangium | Moderate staining on capillary and mesangium        |

| Case    | LM   | IF (LLC)                                                                | TEM                                                   | Novice IHC                                   | Trained IHC                                       |
|---------|------|-------------------------------------------------------------------------|-------------------------------------------------------|----------------------------------------------|---------------------------------------------------|
| B150609 | MGN  | Weak granular staining along capillary walls                            | Subepithelial-intramembranous electron-dense deposits | Moderate staining on capillary and mesangium | Trace nonspecific                                 |
| B150606 | MPGN | Strong granular staining along capillary walls and mesangium            | Subendothelial electron-dense deposits                | Moderate staining on capillary and mesangium | Weak-moderate staining on capillary and mesangium |
| B150603 | MPGN | Weak linear-granular staining along capillary walls                     | Subepithelial, subendothelial, and mesangial zones    | Trace nonspecific                            | Trace nonspecific                                 |
| B150602 | MPGN | Moderate granular staining along capillary walls                        | Subepithelial and subendothelial deposits             | Trace nonspecific                            | Trace nonspecific                                 |
| B150513 | MPGN | Moderate granular staining along capillary walls and mesangium          | Subepithelial, subendothelial, and mesangial zones    | Trace nonspecific                            | Trace nonspecific                                 |
| B150313 | MPGN | Strong granular and chunky staining along capillary walls and mesangium | Subendothelial deposits                               | Trace nonspecific                            | Trace nonspecific                                 |
| B150208 | MGN  | Moderate granular staining along capillary walls                        | Subepithelial deposits                                | Trace nonspecific                            | Trace nonspecific                                 |
| B141201 | MGN  | Moderate-strong granular staining along capillary walls                 | Subepithelial deposits                                | Trace nonspecific                            | Trace nonspecific                                 |
| B141113 | MPGN | Strong granular and chunky staining along capillary walls and mesangium | Subendothelial deposits                               | Trace nonspecific                            | Trace nonspecific                                 |

| Case    | LM  | IF (LLC)                                                  | TEM                    | Novice IHC        | Trained IHC       |
|---------|-----|-----------------------------------------------------------|------------------------|-------------------|-------------------|
| B141008 | MGN | Strong granular and chunky staining along capillary walls | Subepithelial deposits | Trace nonspecific | Trace nonspecific |

FSGS = focal segmental glomerulosclerosis; IHC = immunohistochemistry; MGN = membranous glomerulonephritis; MPGN = membranoproliferative glomerulonephritis.
